# Supplementary material for: In Vitro Evaluation of Bioavailability of Se from Daily Food Rations and Dietary Supplements
Source: Nutrients. 2023 Mar 21;15(6):1511. doi: 10.3390/nu15061511 (PMC10058741; doi:10.3390/nu15061511)
Supplement: Supplementary file 1 [file nutrients-15-01511-s001.zip › nutrients-2290694-supplementary.pdf]

# SUPPLEMENTARY FILE

**Table S1.** Composition of diets used in the study.

| Type of the meal  | Food product/meal                                                | Amount (g/mL)            |
|-------------------|------------------------------------------------------------------|--------------------------|
| <b>Basic diet</b> |                                                                  |                          |
| Breakfast         | cereal coffee with milk                                          | 250                      |
|                   | white bread                                                      | 80                       |
|                   | cottage cheese                                                   | 110                      |
|                   | Onion                                                            | 10                       |
|                   | cucumber                                                         | 30                       |
|                   | butter                                                           | 10 g                     |
| Second breakfast  | mixed bread (wheat-rye flour)                                    | 60                       |
|                   | chicken pate                                                     | 130                      |
|                   | apple                                                            | 150                      |
|                   | black tea infusion                                               | 250                      |
| Lunch             | vegetable soup (including carrots, celery, parsley, cauliflower) | 400 (vegetables – 100 g) |
|                   | poultry chop                                                     | 150                      |
|                   | potatoes                                                         | 300                      |

|                  |                                   |                          |
|------------------|-----------------------------------|--------------------------|
|                  | red cabbage salad                 | 150                      |
|                  | grated strawberry compote         | 250 (strawberries -30 g) |
| Dinner           | meatballs in sauce                | 120                      |
|                  | pasta                             | 120                      |
|                  | salad (carrot, apple, mayonnaise) | 100                      |
|                  | yeast cake with crumble           | 50                       |
|                  | black tea infusion with milk      | 250                      |
| Standard diet    |                                   |                          |
| Breakfast        | ham sausages                      | 150                      |
|                  | mixed bread (wheat-rye flour)     | 90                       |
|                  | cocoa with milk                   | 250                      |
|                  | mustard                           | 20                       |
| Second breakfast | gouda cheese                      | 60                       |
|                  | crispbread                        | 30                       |
|                  | coffee infusion with milk         | 150                      |
| Lunch            | tomato soup with pasta            | 400                      |
|                  | Potatoes                          | 300                      |
|                  | grilled cod                       | 200                      |

|                          |                               |                                   |
|--------------------------|-------------------------------|-----------------------------------|
|                          | salad with sauerkraut         | 150                               |
|                          | compote                       | 250                               |
|                          | coffee infusion with milk     | 150                               |
|                          | milk chocolate with nuts      | 30                                |
| Dinner                   | mixed bread (wheat-rye flour) | 80                                |
|                          | sausages                      | 110                               |
|                          | pickled cucumber              | 80                                |
|                          | black tea infusion            | 250                               |
| <b>High-residue diet</b> |                               |                                   |
| Breakfast                | oatmeal in milk               | oat flakes – 50 g<br>milk – 350 g |
|                          | wholemeal bread               | 80                                |
|                          | cottage cheese                | 80                                |
|                          | jam                           | 20                                |
| Second breakfast         | mixed bread (wheat-rye flour) | 80                                |
|                          | rennet cheese                 | 40                                |
|                          | ham                           | 440                               |
|                          | tomatoes                      | 150                               |

|        |                                                                             |                                                                          |
|--------|-----------------------------------------------------------------------------|--------------------------------------------------------------------------|
|        | banana                                                                      | 100                                                                      |
|        | black tea infusion                                                          | 250                                                                      |
| Lunch  | beetroot soup                                                               | 400 (beetroot – 30 g;<br>vegetables: carrots, parsley,<br>celery – 25 g) |
|        | pork chop                                                                   | 150                                                                      |
|        | potatoes                                                                    | 300                                                                      |
|        | boiled vegetables (carrots with<br>peas 1+1 with breadcrumbs<br>and butter) | 300                                                                      |
|        | apple                                                                       | 150                                                                      |
|        | strawberry compote                                                          | 200                                                                      |
| Dinner | mixed bread (wheat-rye flour)                                               | 80                                                                       |
|        | chicken ham                                                                 | 80                                                                       |
|        | red pepper                                                                  | 150                                                                      |
|        | butter                                                                      | 10 g                                                                     |
|        | coffee infusion with milk                                                   | 150                                                                      |

**Table S2.** Selected nutritional parameters of diets used in the study.

| Parameter                           | Diet                |                    |                    |
|-------------------------------------|---------------------|--------------------|--------------------|
|                                     | Basic               | Standard           | High-residue       |
| Proteins (g)<br>10-20% of E**       | 116.8 (17.3% of E*) | 153.9 (22.2% of E) | 143.5 (18.5% of E) |
| Fats (g)<br>20-35% of E**           | 109.2 (36.4% of E)  | 129 (41.9% of E)   | 117.1 (34% of E)   |
| Carbohydrates (g)<br>45-65% of E**  | 338 (46.3% of E)    | 272.2 (35.8% of E) | 416 (47.5% of E)   |
| Fiber (g)                           | 28.6                | 24.6               | 50.2               |
| Vitamin A (µg)                      | 2960                | 500                | 4600               |
| Vitamin C (µg)                      | 80.6                | 54.8               | 304.7              |
| Vitamin E (mg)                      | 17.2                | 15.9               | 24.7               |
| Calcium (mg)                        | 568.7               | 1203               | 1465               |
| Sodium (mg)                         | 2370                | 4865               | 3290               |
| Potassium (mg)                      | 4877                | 5615               | 6837               |
| Magnesium (mg)                      | 361                 | 562.9              | 693                |
| Iron (mg)                           | 14.3                | 17.2               | 21.7               |
| Selenium (µg)<br>(determined value) | 41.5                | 45.7               | 42.3               |

|                  |      |      |      |
|------------------|------|------|------|
| Energy (kcal)    | 2699 | 2770 | 3099 |
| Total weight (g) | 2970 | 2750 | 3285 |

\* Percentage of energy

\*\* Recommended intake

**Table S3.** Operating parameters in the ICP-OES method.

|                               |                         |
|-------------------------------|-------------------------|
| Analytical line, reading time | Se 196.028 nm, 6 s      |
| Signal reading type           | axial                   |
| Signal integration            | 3 pix                   |
| Plasma generator power        | 1300 W                  |
| Coolant gas flow rate         | 14 L·min <sup>-1</sup>  |
| Auxiliary gas flow rate       | 0.5 L·min <sup>-1</sup> |
| Carrier gas flow rate         | 0.6 L·min <sup>-1</sup> |
| Sample flow rate              | 1.0 L·min <sup>-1</sup> |
